# Supplementary material
Source: Springer Nature journal article supplement (https://www.springermedizin.de/resource/supplementary/12974_2010_242_MOESM4_ESM.pdf/9601078)

control

DMF

55 -

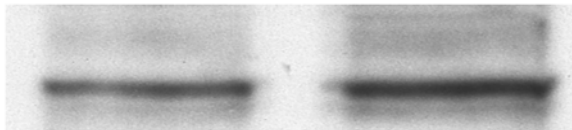

— Nrf2

72 -

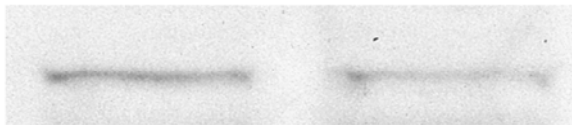

— Lamin A/C

Supplement: MOESM4 [file 9601078]
